29 [Jay.hinton@liverpool.ac.uk](mailto:Jay.hinton@liverpool.ac.uk)

30

31 Juno Thomas

32 [junot@nicd.ac.za](mailto:junot@nicd.ac.za)

33

34 Anthony Marius Smith

35 [anthonys@nicd.ac.uk](mailto:anthonys@nicd.ac.uk)

36

37 **1.4 Keyword**

38 Non-typhoidal *Salmonella*, real-time PCR, phylogeny, molecular surveillance

39

## 40 **2. Abstract**

41 *Salmonella* Enteritidis is one of the most commonly reported serovars of non-typhoidal *Salmonella*  
42 causing human disease and is responsible for both gastroenteritis and invasive non-typhoidal  
43 *Salmonella* (iNTS) disease worldwide. Whole-genome sequence (WGS) comparison of *Salmonella*  
44 Enteritidis isolates from across the world have identified three distinct clades, named Global  
45 Epidemic, Central/East African and West African, all of which have been implicated in epidemics: the  
46 Global Epidemic clade was linked to poultry-associated gastroenteritis, while the two African clades  
47 were related to iNTS disease. However, the distribution and epidemiology of these clades across  
48 Africa is poorly understood because identification of these clades currently requires whole genome  
49 sequencing capacity. Here, we report a sensitive, time- and cost-effective real-time PCR assay  
50 capable of differentiating between the *Salmonella* Enteritidis clades to facilitate surveillance and to  
51 inform public health responses.

## 52 **3. Impact statement**

53 Challenges in the diagnosis and treatment of invasive *Salmonella* Enteritidis (*S. Enteritidis*)  
54 bloodstream infections in sub-Saharan Africa are responsible for a case fatality rate of approximately  
55 15% (12). It is important to identify distinct clades of *S. Enteritidis* in diagnostic laboratories in the  
56 African setting to determine whether particular outbreaks are associated with different health  
57 outcomes. Here, we have described the development of a high-quality molecular classification assay  
58 for the clade-typing of *S. Enteritidis* that is ideal for use in public health laboratories in resource-limited  
59 settings.

## 60 4. Introduction

61 The key human pathogen *Salmonella enterica* has over 2,500 serovariants, determined by O and K  
62 surface antigens, and within individual serovars, there can be distinct pathotypes that currently require  
63 whole genome sequencing (WGS) to identify. This diversity makes it challenging for surveillance  
64 systems to identify lineages of concern and thus the importance of specific variants is not  
65 communicated to public health authorities and policy makers. Sub-Saharan African (sSA) countries  
66 bear the greatest global burden of foodborne disease, are under pressure to increase production of  
67 protein-rich foods, often in the form of meat, but often have limited food, water and environmental  
68 surveillance capacity (1).

69 The best available evidence suggests that animal-source foods are the primary origin of foodborne  
70 pathogens in sSA (2). With global poultry production surpassing pork production in 2018, it is  
71 understandable that the poultry-associated non-typhoidal *Salmonella* (NTS) serovar, *Salmonella*  
72 Enteritidis, (*S. Enteritidis*), is the most reported foodborne pathogen in sSA (3). Generally, *S.*  
73 Enteritidis infections are associated with outbreaks of gastroenteritis in Europe and the United States  
74 (4,5). However, *S. Enteritidis* infections in sSA regions are commonly associated with severe, invasive  
75 bloodstream infections, known as invasive non-typhoidal *Salmonella* disease (hereafter named iNTS)  
76 (6,7).

77 The disproportionately high number of iNTS infections in sSA - approximately 79% of the global  
78 burden of iNTS (a 2017 estimate) – is closely associated with the high-risk populations in sSA (high  
79 numbers of advanced HIV infections, malaria and young children with immature immune systems) (7).  
80 The high prevalence of immunosuppressed individuals in sSA has facilitated the emergence of iNTS  
81 as a major public health problem, with the two key serovars being *S. Enteritidis* and *S. Typhimurium*  
82 (8,9) A 2016 study investigated the diversity of *S. Enteritidis* in sSA and, in addition to a globally  
83 prevalent poultry associated lineage, identified two geographically distinct groups of *S. Enteritidis*  
84 strains circulating in sSA, namely the West African and the Central/ Eastern African clade (hereafter  
85 the “East African clade”) (8). The West and East African clades were quite distinct from *S. Enteritidis*  
86 strains commonly associated with global gastroenteritis outbreaks, the Global Epidemic clade, raising  
87 the possibility of different ecological niche adaptation (8).

88 Despite the recognition of distinct *S. Enteritidis* clades and the severity of iNTS disease, the  
89 distribution and epidemiology of these clades across sSA remains poorly understood (10,11). The  
90 lack of data pertaining to *S. Enteritidis* clades in sSA is, in part, due to the lack of a distinct molecular  
91 typing system for *S. Enteritidis* (12–14). The closely related *S. Typhimurium* has similarly unique  
92 clinical and epidemiological characteristics between *S. Typhimurium* subtypes that can be clustered  
93 using Multi-Locus Sequence Typing (MLST). Indeed, sequence type (ST) 313 has been associated

94 with epidemics of bloodstream infection, in contrast with the globally distributed ST19 that is mostly  
95 associated with gastroenteritis (15,16). However, MLST fails to distinguish between *S. Enteritidis*  
96 variants, with the majority of the isolates being assigned to ST11 (17). This becomes  
97 epidemiologically problematic when outbreaks of pathologically distinct *S. Enteritidis* clades are  
98 treated as a singular sequence type.

99

100 For public health officials and policy makers to both be aware of iNTS as a cause of severe febrile  
101 illness and institute policy to interrupt transmission and prevent iNTS, there needs to be capacity to  
102 make the distinction between the gastroenteritis-associated Global clade and the multidrug-resistant,  
103 invasive infection-associated East and West African clades (12). Currently, the best way to distinguish  
104 between *S. Enteritidis* clades is through whole-genome sequencing, which is not widely available in  
105 sSA (19). Ideally, regional public health laboratories need access to robust, accurate and cost-  
106 effective tests with a rapid turnaround time capable of differentiating between genetically similar  
107 isolates in order to facilitate appropriate epidemiological investigation of distinct pathovariants.

108

109 Real-time PCR assays are a commonly used method for the highly specific and sensitive  
110 classification of foodborne diseases, thus are widely available (20). When the real-time PCR assay is  
111 multiplexed, it has the advantage of being able to identify multiple pathogens with a single assay (20).  
112 The scalability and rapid turn-around-time of real-time PCR assays is also beneficial for use in  
113 diagnostic settings (20). The aim of the real-time PCR assay developed in this study is to classify *S.*  
114 *Enteritidis* isolates into clades in order to assist laboratories in typing *S. Enteritidis* strains to aid in  
115 surveillance of variants with an identical antigenic formula, but which require different public health  
116 responses.

117

## 118 **5. Methods**

119 In respect of the phyletic structure of *S. Enteritidis*, we have designed primers to distinguish three  
120 clades and an outlier cluster in a single reaction. These are henceforth denoted “Regional” and  
121 “Clade”. The purpose of the Regional (African or Global classification) and Clade (Global Epidemic,  
122 Global Outlier, East or West African classification) assays is to further classify *S. Enteritidis* isolates to  
123 better understand the transmission and epidemiology of each *S. Enteritidis* clade. The Regional and  
124 Clade assays described here are limited to previously confirmed *S. Enteritidis* isolates.

## 125 **Control panel isolates**

126 The control panel consisted of 12 *S. Enteritidis* strains that were used as positive controls in the  
127 development of the multiplexed real-time PCR assays. The 12 *S. Enteritidis* isolates were obtained as  
128 part of the 10,000 *Salmonella* Genomes project (21) and were selected based on the previously  
129 published *S. Enteritidis* global population structure predicted by the hierBAPS (hierarchical Bayesian  
130 Analysis of Population Structure) algorithm (10). The control panel was assembled to represent the  
131 East African (n=3), West African (n=3), Global Epidemic (n=3) and Global Outlier (n=3) clades (Table  
132 1). The clades were grouped according to region, the Global (Global Epidemic and Global Outlier)  
133 and African (East African and West African) regions (Table 1). All *S. Enteritidis* samples were stored  
134 at -70°C in 500 µL Tryptic Soy broth media (1 L distilled water, 17 g casein, 5 g NaCl, 3 g soytone, 2.5  
135 g dextrose, 2.5 g dipotassium phosphate, adjusted to pH 7.3).

## 136 **Genomic DNA extraction**

137 The control panel isolates were streaked on 5% blood agar (Diagnostic Media Products,  
138 Johannesburg, South Africa) plates and incubated overnight in an IN 750 incubator (Mettler,  
139 Schwabach, Germany) at 37°C. Single colonies were resuspended in 400 µL of 10X TE buffer (800  
140 mL distilled water, 2.92 g Tris, 15.76 g EDTA (pH 8)) in 2 mL Safe-Lock tubes (Eppendorf, Hamburg,  
141 Germany). The QIAamp DNA Mini Kit (QIAGEN, Hilden, Germany) was used to extract genomic DNA  
142 according to the instructions provided by the manufacturer. Final DNA concentrations were quantified  
143 fluorometrically using the Qubit 2.0 Fluorometer (ThermoFisher Scientific, California, USA).

## 144 **Whole-genome sequencing**

145 The control panel isolates were sequenced and assembled as part of the 10,000 *Salmonella*  
146 Genomes project using the LITE pipeline for library construction, and Illumina HiSeq™ 4000 system  
147 (Illumina, California, USA) (21). Whole-genome sequences of all 12 *S. Enteritidis* isolates were  
148 annotated using Prokka v.1.14.5 (22). The resulting annotated genomes were analysed using ROARY  
149 v.3.11.2 (23), producing a gene presence/ absence matrix that compared the gene differences across  
150 the whole genome of each of the control panel isolates.

## 151 **Development of the multiplexed real-time PCR assays**

152 Target genes for the clade-typing real-time PCR assay were selected based on the presence/  
153 absence matrix (Figure 1). To confirm the specificity of the selected genes, a clade typing of 500 of  
154 the *S. Enteritidis* genomes available on EnteroBase v1.1.3 was performed. A “Workspace” with the  
155 500 of the *S. Enteritidis* genomes used in the published *S. Enteritidis* global population analysis (10)  
156 from whole genome sequences obtained as part of the 10,000 *Salmonella* Genomes project (21) was  
157 created. A custom multi-locus sequence typing analysis scheme using the target genes from the

158 clade-typing real-time PCR assay was then used to type the *S. Enteritidis* genomes into clades. The  
159 clade results from this EnteroBase query were then compared with the *S. Enteritidis* global population  
160 structure predicted by the hierBAPS algorithm (8).

### 161 **Real-time PCR assay conditions**

162 All primers and probes were diluted to a concentration of 20  $\mu$ M using nuclease-free water (Ambion,  
163 ThermoFisher Scientific, California, USA). Four master mixes for the two multiplex real-time PCR  
164 assays (Regional assay and Clade assay) were prepared as summarized in Table 2. A real-time PCR  
165 assay was set up using 25  $\mu$ L of TaqMan Gene Expression Master Mix (ThermoFisher Scientific,  
166 California, USA), 17.8  $\mu$ L of nuclease-free water (Ambion, ThermoFisher Scientific, California, USA),  
167 3  $\mu$ L of the relevant Master Mix (

168 Table 2) Master Mix One for the Regional assay and Master Mix Two for the Clade assay) and 1.2  $\mu$ L  
169 of DNA template to each well of the MicroAmp<sup>®</sup> Optical 96-well reaction plate (Applied Biosystems,  
170 ThermoFisher Scientific, California, USA). In each run, a negative control (1.2  $\mu$ L of nuclease-free  
171 water instead of DNA template) was added to the last well of the MicroAmp<sup>®</sup> Optical 96-well reaction  
172 plate. The wells were then sealed with a MicroAmp<sup>®</sup> Optical Adhesive Film (Applied Biosystems, Life  
173 Technologies<sup>™</sup>, California, USA) and centrifuged at 15 000 RPM for 1 minute using an Allegra<sup>™</sup> X-  
174 22R Centriuge (Beckman Coulter<sup>™</sup>, California, USA) to ensure all reagents were concentrated at the  
175 bottom of the wells. The plate was then loaded into a 7500 Real Time PCR System (Applied  
176 Biosystems, Life Technologies<sup>™</sup>, California, USA) and set up with the 7500 Real Time PCR System  
177 software version 2.0 (Applied Biosystems, Life Technologies<sup>™</sup>, California, USA). The reactions  
178 underwent PCR amplification as follows: 50°C for 2 min, followed by 95°C for 10 min and 40 cycles of  
179 95°C for 15 s, 60°C for 30 s and 72°C for 30 s.

## 180 Multiplex RT-PCR assay performance

181 To determine the efficiency of the multiplex real-time PCR assay, 10-fold serial dilutions of genomic  
182 DNA extracted from two control isolates (D7795 and A1636) were prepared. The DNA concentration  
183 of each dilution was quantified spectroscopically using a NanoDrop 1000 Spectrophotometer  
184 (ThermoFisher Scientific, California, USA). A real-time PCR assay was then set up as described  
185 above using Master Mix One and Two for the Regional assay and Three and Four for the Clade  
186 assay. The DNA concentration yielding the highest Ct value below 30 cycles was determined to be  
187 the limit of detection for that primer and probe set, in three technical replicates. The linear range ( $R^2$ )  
188 was calculated for the Ct values of the triplicate assays for each primer and probe set using the  
189 CORREL function in Microsoft Excel 2010. The slopes of calibration curves were used to calculate the  
190 amplification efficiency (PCR efficiency =  $10^{-1/\text{slope}} - 1$ ) (24).

## 191 6. Results and discussion

### 192 Oligonucleotide design

193 A gene presence/absence matrix produced from the pan genome analysis of the 12 control panel  
194 isolates was used to identify unique gene target sequences that distinguished clades associated with  
195 different geographical regions. These included the *BTN76\_08545* gene (family protein accession  
196 number WP\_023229131.1) for the African region and the *SEN1975* gene for the Global region (family  
197 protein accession number WP\_001075993.1). Individual clades were recognised using the *SEN1943*  
198 gene (family protein accession number WP\_058658682.1) for the Global Epidemic clade and *pemI*  
199 (protein accession number WP\_096198836.1) gene for the East African clade. To determine the  
200 sensitivity of the selected genes, a multi-locus query based on the presence/absence of genes  
201 *BTN76\_08545*, *SEN1975*, *SEN1943* and *pemI* in the whole-genome sequences from 500 *S.*



202 Enteritidis isolates was performed using EnteroBase v 1.1.3. When compared with the clade outcome  
203 predicted by the hierBAPS algorithm on the 500 *S. Enteritidis* whole-genome sequences (10), the  
204 multi-locus classification was 90% effective in predicting the clade of the *S. Enteritidis* isolate  
205 (Supplementary Table 1).

206

207 The four selected genes were then used to design primers and probes using the online PrimerQuest  
208 tool (Integrated DNA Technology; accessible online: <https://eu.idtdna.com/pages/tools/primerquest>)  
209 (Table 3). The specificity of the designed primers and probes was tested on the whole-genome  
210 sequences of the 12 control panel isolates using the *in silico* PCR tool in CLC Genomics Workbench  
211 version 11.0.1 (QIAGEN, Hilden, Germany). The African cluster primer set amplified an 82 bp  
212 fragment of the *BTN76\_08545* gene for all six African isolates tested (isolates 10136/01, 0527/01,  
213 8078/01, D7795, CP255, and 6396). The Global region primer set amplified a 126 bp fragment of the  
214 *SEN1975* gene for all six Global region isolate sequences (isolates P125109, A1636, 1320, 791,  
215 672246, and 672632). The East African clade primer set amplified a 101 bp fragment of the *pemI*  
216 gene from the East African clade isolate sequences (isolates D7795, CP255, and 6396). The Global  
217 Epidemic clade primer set amplified an 85 bp fragment of the *SEN1943* gene from the Global  
218 Epidemic clade isolate sequences (isolates P125109, A1636, and 1320) (Supplementary Table 2).

219

## 220 **Validation of the real-time PCR assays**

221 The clade-typing real-time PCR assay strongly amplified (Ct value < 30) the relevant target genes for  
222 all 12 control panel isolates listed in Table 1, allowing each isolate to be classified into the appropriate  
223 clade (Table 4). There was no weak positive (Ct values > 30) or off-target amplification of the target  
224 genes was observed for the Regional and Clade real-time PCR assays (Table 4). Using a dilution  
225 series, the limit of detection was determined as the lowest DNA concentration resulting in a true  
226 positive (Ct < 30). The limit of detection for these assays was determined to be 0.1 µM (

227 Table 6).

228

## 229 **Performance analysis of the real-time PCR assays**

230 To determine assay efficiency, the Region and Clade real-time PCR assays were performed using  
231 serial dilutions (10-fold) of the genomic DNA extracted from two control isolates (D7795 and A1636),  
232 and calibration curves were plotted to assess the linear range (assessment of how well the assay

233 amplifies the target gene at various DNA concentrations ( $R^2$ ) and the amplification efficiency (how  
234 well the assay amplifies the target gene region).

235

236 The Region real-time PCR assay that contained African and Global Region primer and probe sets had  
237 linear ranges of 0.98 and 1.00 respectively (Table 5). The Clade real-time PCR assay that contained  
238 East African clade and Global Epidemic clade primer and probe sets both had linear ranges of 0.99  
239 (Table 5). Thus, the linear range for the clade-typing assay complied with the required  $R^2 \geq 0.98$  (25),  
240 meaning that the primer and probes for the Region and Clade real-time PCR assays efficiently  
241 amplified the target genes. The amplification efficiencies were calculated based on the slope of  
242 calibration curves. The theoretical maximum amplification efficiency is 1.00, which indicates that the  
243 amount of product doubles with each cycle (26). The Region and Clade assays performed at an  
244 average efficiency of 1.00 and 1.04 respectively (Table 5).

245

## 246 **7. Conclusion**

247 Here, we have described the development of a high-quality molecular classification assay for the  
248 clade-typing of *S. Enteritidis* that is ideal for use in public health laboratories, especially where WGS  
249 is not readily available. All primer and probe sets for the Region and Clade assays ran at optimal  
250 efficiency within the multiplex assays. This novel multiplex PCR assay could be used to investigate  
251 whether certain clades of *S. Enteritidis* because human disease of differing severity.

## 252 **8. Author statements**

### 253 **8.1 Authors and contributors**

254 Sarah Gallichan: Investigation; Experimental Design; Validation of Methodology

255 Nicholas Feasey: Supervision; Review & editing

256 Blanca Perez-Sepulveda: Resources; Review & editing; Validation of Methodology

257 Jay Hinton: Resources; Review & editing

258 Juno Thomas: Supervision

259 Anthony Marius Smith: Supervision; Review & editing

260

### 261 **8.2 Conflicts of interest**

262 None to declare

263

### 264 **8.3 Funding information**

265 This work was supported by the German Federal Ministry of Education and Research [BMBF grant  
266 number: 81203616], and, in part, by a Wellcome Trust Senior Investigator award [grant number  
267 106914/Z/15/Z] to J.C.D.H. For the purpose of open access, the authors have applied a CC BY public  
268 copyright licence to any Author Accepted Manuscript version arising from this submission.

269

### 270 **8.4 Ethical approval**

271 Ethical clearance for all laboratory-based surveillance and research (approved 12 November 2018)  
272 was obtained from the University of Witwaterstrand, Johannesburg, South Africa (Wits protocol no.  
273 M140159) by the Centre for Enteric Diseases, National Institute for Communicable Diseases.

## 274 9. References

- 275 1. Aworh OC. Food safety issues in fresh produce supply chain with particular reference to sub-  
276 Saharan Africa. *Food Control*. 2021 May 1;123:107737.
- 277 2. Grace D, Alonso S, Mutua F, Roesel K, Lindahl J, Amenu K. Food safety investment expert  
278 advice: Burkina Faso, Ethiopia, Nigeria. [cited 2022 Mar 14]; Available from: [www.ilri.org](http://www.ilri.org)
- 279 3. • Production of meat worldwide by meat type, 2021 | Statista [Internet]. [cited 2022 Mar 6].  
280 Available from: [https://www.statista.com/statistics/237632/production-of-meat-worldwide-](https://www.statista.com/statistics/237632/production-of-meat-worldwide-since-1990/)  
281 [since-1990/](https://www.statista.com/statistics/237632/production-of-meat-worldwide-since-1990/)
- 282 4. European Food Safety Authority and European Centre for Disease Prevention and Control  
283 (EFSA and ECDC). The European Union One Health 2018 Zoonoses Report [Internet]. 2019  
284 [cited 2022 Mar 6]. Available from:  
285 [https://www.ecdc.europa.eu/sites/default/files/documents/zoonoses-EU-one-health-2018-](https://www.ecdc.europa.eu/sites/default/files/documents/zoonoses-EU-one-health-2018-report.pdf)  
286 [report.pdf](https://www.ecdc.europa.eu/sites/default/files/documents/zoonoses-EU-one-health-2018-report.pdf)
- 287 5. Tack DM, Marder EP, Griffin PM, Cieslak PR, Dunn J, Hurd S, et al. Preliminary Incidence and  
288 Trends of Infections with Pathogens Transmitted Commonly Through Food — Foodborne  
289 Diseases Active Surveillance Network, 10 U.S. Sites, 2015–2018. *Morbidity and Mortality*  
290 *Weekly Report* [Internet]. 2019 Apr 26 [cited 2022 Mar 6];68(16):369. Available from:  
291 [/pmc/articles/PMC6483286/](https://pubmed.ncbi.nlm.nih.gov/3128286/)
- 292 6. Reddy EA, Shaw A v, Crump JA. Community-acquired bloodstream infections in Africa: a  
293 systematic review and meta-analysis. *The Lancet Infectious Diseases*. 2010;10(6):417–32.
- 294 7. Gordon MA, Feasey NA, Nyirenda TS, Graham SM. Nontyphoid Salmonella Disease. *Hunter’s*  
295 *Tropical Medicine and Emerging Infectious Diseases* [Internet]. 2020 Jan 1 [cited 2019 Jun  
296 24];500–6. Available from:  
297 <https://www.sciencedirect.com/science/article/pii/B9780323555128000491>
- 298 8. Feasey NA, Hadfield J, Keddy KH, Dallman TJ, Jacobs J, Deng X, et al. Distinct Salmonella  
299 Enteritidis lineages associated with enterocolitis in high-income settings and invasive disease  
300 in low-income settings. *Nature Genetics*. 2016;48(10):1211–7.
- 301 9. Stanaway JD, Parisi A, Sarkar K, Blacker BF, Reiner RC, Hay SI, et al. The global burden of non-  
302 typhoidal salmonella invasive disease: a systematic analysis for the Global Burden of Disease  
303 Study 2017. *The Lancet Infectious Diseases* [Internet]. 2019 Sep [cited 2019 Oct 11]; Available  
304 from: <https://linkinghub.elsevier.com/retrieve/pii/S1473309919304189>
- 305 10. Sánchez-Vargas FM, Abu-El-Haija MA, Gómez-Duarte OG. Salmonella infections: An update  
306 on epidemiology, management, and prevention. *Travel Medicine and Infectious Disease*.  
307 2011;9(6):263–77.

- 308 11. Feasey NA, Dougan G, Kingsley RA, Heyderman RS, Gordon MA. Invasive non-typhoidal  
309 salmonella disease: an emerging and neglected tropical disease in Africa. *Lancet*.  
310 2012;379(9835):2489–99.
- 311 12. Swaminathan B, Barrett TJ, Hunter SB, Tauxe R V., CDC PulseNet Task Force. PulseNet: The  
312 Molecular Subtyping Network for Foodborne Bacterial Disease Surveillance, United States.  
313 *Emerging Infectious Diseases*. 2001;7(3):382–9.
- 314 13. Hudson CR, Garcia M, Gast RK, Maurer JJ. Determination of close genetic relatedness of the  
315 major *Salmonella enteritidis* phage types by pulsed-field gel electrophoresis and DNA  
316 sequence analysis of several *Salmonella* virulence genes. *Avian Dis*. 45(4):875–86.
- 317 14. Liebana E, Garcia-Migura L, Breslin MF, Davies RH, Woodward MJ. Diversity of Strains of  
318 *Salmonella enterica* Serotype Enteritidis from English Poultry Farms Assessed by Multiple  
319 Genetic Fingerprinting. *Journal of Clinical Microbiology*. 2001;39(1):154–61.
- 320 15. Okoro CK, Kingsley RA, Connor TR, Harris SR, Parry CM, Al-Mashhadani MN, et al. Intra-  
321 continental spread of human invasive *Salmonella* Typhimurium pathovariants in sub-Saharan  
322 Africa. *Nat Genet [Internet]*. 2012 Nov [cited 2021 Dec 9];44(11):1215. Available from:  
323 </pmc/articles/PMC3491877/>
- 324 16. Kingsley RA, Msefula CL, Thomson NR, Kariuki S, Holt KE, Gordon MA, et al. Epidemic multiple  
325 drug resistant *Salmonella* Typhimurium causing invasive disease in sub-Saharan Africa have a  
326 distinct genotype. *Genome Research [Internet]*. 2009 Dec [cited 2021 Dec 9];19(12):2279.  
327 Available from: </pmc/articles/PMC2792184/>
- 328 17. Fandiño LC, Verjan-García N, Fandiño LC, Verjan-García N. A common *Salmonella* Enteritidis  
329 sequence type from poultry and human gastroenteritis in Ibagué, Colombia. *Biomédica*  
330 [Internet]. 2019 [cited 2022 Mar 30];39:50–62. Available from:  
331 [http://www.scielo.org.co/scielo.php?script=sci\\_arttext&pid=S0120-](http://www.scielo.org.co/scielo.php?script=sci_arttext&pid=S0120-41572019000500050&lng=en&nrm=iso&tlng=en)  
332 [41572019000500050&lng=en&nrm=iso&tlng=en](http://www.scielo.org.co/scielo.php?script=sci_arttext&pid=S0120-41572019000500050&lng=en&nrm=iso&tlng=en)
- 333 18. Marchello CS, Birkhold M, Crump JA, Martin LB, Ansah MO, Breggi G, et al. Complications and  
334 mortality of non-typhoidal salmonella invasive disease: a global systematic review and meta-  
335 analysis. *The Lancet Infectious Diseases [Internet]*. 2022 [cited 2022 Mar 14];0(0). Available  
336 from: <http://www.thelancet.com/article/S1473309921006150/fulltext>
- 337 19. Becker SL. WGS for infection prevention and control in Africa. *The Lancet Microbe [Internet]*.  
338 2020 Jul 1 [cited 2022 Mar 14];1(3):e95–6. Available from:  
339 <http://www.thelancet.com/article/S2666524720300677/fulltext>
- 340 20. Woan-Fei Law J, Ab Mutalib NS, Chan KG, Lee LH, Matthews Ciira K, Cheah J. Rapid methods  
341 for the detection of foodborne bacterial pathogens: principles, applications, advantages and  
342 limitations. 2015; Available from: [www.frontiersin.org](http://www.frontiersin.org)

- 343 21. Perez-Sepulveda B, Heavens D, Pulford C, Predeus A, Low R, Webster H, et al. An accessible,  
344 efficient and global approach for the large-scale sequencing of bacterial genomes. bioRxiv  
345 [Internet]. 2020 Jul 22 [cited 2021 Jan 14];2020.07.22.200840. Available from:  
346 <https://doi.org/10.1101/2020.07.22.200840>
- 347 22. Seemann T. Prokka: rapid prokaryotic genome annotation. *Bioinformatics*. 2014 Jul  
348 15;30(14):2068–9.
- 349 23. Page AJ, Cummins CA, Hunt M, Wong VK, Reuter S, Holden MTG, et al. Roary: rapid large-  
350 scale prokaryote pan genome analysis. *Bioinformatics*. 2015 Nov 15;31(22):3691–3.
- 351 24. Rutledge RG, Co C. Mathematics of quantitative kinetic PCR and the application of standard  
352 curves.
- 353 25. Gevertz JL, Dunn SM, Roth CM. Mathematical Model of Real-Time PCR Kinetics.
- 354 26. Bustin SA, Benes V, Garson JA, Hellemans J, Huggett J, Kubista M, et al. The MIQE Guidelines:  
355 Minimum Information for Publication of Quantitative Real-Time PCR Experiments. *Clinical*  
356 *Chemistry*. 2009 Apr 1;55(4):611–22.
- 357
- 358

## 359 10. Figures and tables

360 **Figure 1** Workflow depicting the clade-typing of a *Salmonella* Enteritidis isolate based on the  
 361 presence (green) or absence (red) of genes targeted by the clade-typing real-time PCR assay

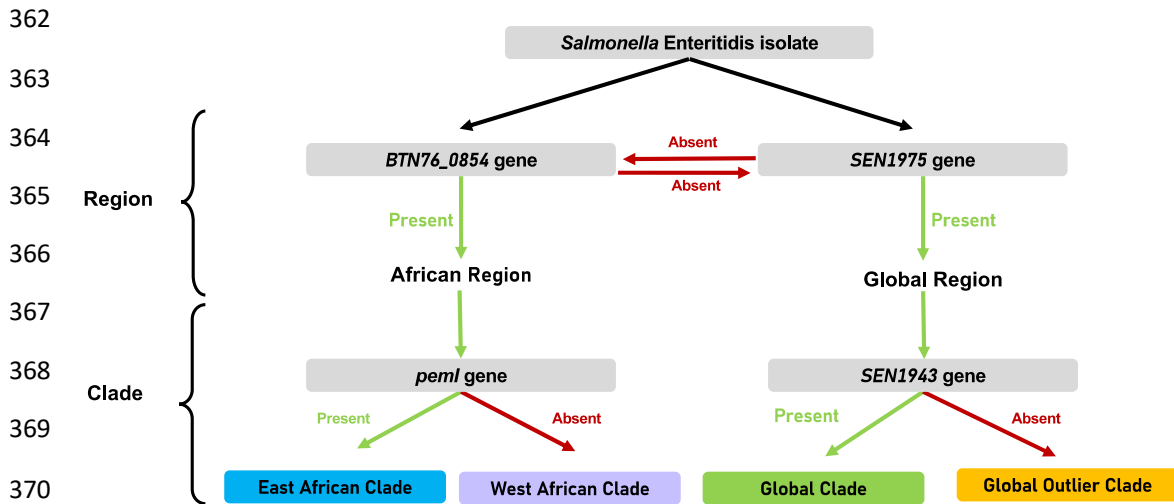

| Isolate name | NCTC number* | Origin | Clade | Cluster | References |
|--------------|--------------|--------|-------|---------|------------|
|--------------|--------------|--------|-------|---------|------------|

371

372

373

374

**Table 1** *Salmonella* Enteritidis strains used as a control panel in this study

|          |       |              |                 |         |                                                               |
|----------|-------|--------------|-----------------|---------|---------------------------------------------------------------|
| P125109  | 13349 | UK           | Global Epidemic | Global  | Thomas <i>et al.</i> 2008; Perez-Sepulveda <i>et al.</i> 2021 |
| A1636    | 14674 | Malawi       | Global Epidemic |         | Feasey <i>et al.</i> 2016; Perez-Sepulveda <i>et al.</i> 2021 |
| 1320     |       | Uganda       | Global Epidemic |         | This study                                                    |
| 791      |       | Uganda       | Global Outlier  |         | This study                                                    |
| 672246   |       | South Africa | Global Outlier  |         | This study                                                    |
| 672632   |       | South Africa | Global Outlier  |         | This study                                                    |
| D7795    | 14676 | Malawi       | East African    | African | Feasey <i>et al.</i> 2016; Perez-Sepulveda <i>et al.</i> 2021 |
| CP225    | 14675 | DRC          | East African    |         | Perez-Sepulveda <i>et al.</i> 2021                            |
| 6396     |       | Uganda       | East African    |         | This study                                                    |
| 10136/01 |       | Gambia       | West African    |         | Darboe <i>et al.</i> 2020 (bioRxiv)                           |
| 0527/01  |       | Gambia       | West African    |         | Darboe <i>et al.</i> 2020 (bioRxiv)                           |
| 8078/01  |       | Gambia       | West African    |         | Darboe <i>et al.</i> 2020 (bioRxiv)                           |

375

376 Footnote: \* Strains with NCTC numbers are available from <https://www.culturecollections.org.uk/>



377 **Table 2** Constituents of the two Master Mixes used in the Regional Master Mix and Clade Master Mix  
378 real-time PCR

|                | Regional Master Mix |            | Clade Master Mix      |                    |
|----------------|---------------------|------------|-----------------------|--------------------|
|                | African             | Global     | Global Epidemic clade | East African clade |
| Forward primer | African-F           | Global-F   | Epidemic-F            | East-F             |
| Reverse primer | African-R           | Global-R   | Epidemic-R            | East-R             |
| Probe          | African-FAM         | Global-CY5 | Epidemic-CY2          | East-FAM           |

379

380

381 **Table 3** Primer and probe sequences for the development of the *Salmonella* Enteritidis clade-typing  
382 real-time PCR assay

| Primer or probe |                      |                                          |                  |                          |
|-----------------|----------------------|------------------------------------------|------------------|--------------------------|
| Target gene     | Oligonucleotide name | Sequence (5' to 3')                      | Accession number | Nucleotide position      |
| BTN76_08545     | African-F            | TTGTATTGCGGTGGTACTCATA                   | CP018655.1       | 1 645 944 -<br>1 646 084 |
|                 | African-R            | AAACTCCGCACCTCCTAATC                     |                  |                          |
|                 | African-FAM          | 56-FAM-TTACGCGGTTTCGTTATGCGAGCTA-3IABkFQ |                  |                          |
| SEN1975         | Global-F             | CTCGGTTTGGAGTTGTTGTTT                    | AM933172.1       | 2 065 272 -<br>2 066 153 |
|                 | Global-R             | CGTGCCAGATAGGCAGTATTA                    |                  |                          |
|                 | Global-CY5           | 5CY5-TGACTGCTAGAGAGATGAGCGGTGA-3IABkFQ   |                  |                          |
| pemI            | East-F               | CTGTCGCTGGGTACAGATAATG                   | CP063703.1       | 99 954 -<br>100 054      |
|                 | East-R               | AACAGCTCAGCCAGTGAATAC                    |                  |                          |
|                 | East-FAM             | 56-FAM-TGATAATGGCCGGCTGATTGTGGA-3IABkFQ  |                  |                          |
| SEN1943         | Epidemic-F           | TTTCTGTCAGCCAGTCCATTC                    | AM933172.1       | 2 040 288 -<br>2 040 905 |
|                 | Epidemic-R           | TACGTGGTTGCCTGATGTATTC                   |                  |                          |
|                 | Epidemic-CY2         | 5CY5-TGCGTTACACGGACAACATCACCT-3IABkFQ    |                  |                          |

383

384 **Table 4** Average cycle threshold (Ct) values from the clade-typing real-time PCR assays performed  
385 using the control panel isolates. Ct values under 30 indicate a positive result and Ct values over 30  
386 indicate a negative result (shown as “-“)

| Real-time PCR Ct values for target genes |                 |                    |                |             |                |                            |
|------------------------------------------|-----------------|--------------------|----------------|-------------|----------------|----------------------------|
| Isolate name                             | Expected Clade* | <i>BTN76_08545</i> | <i>SEN1975</i> | <i>pemI</i> | <i>SEN1943</i> | Real-time PCR clade result |
| P125109                                  | Global Epidemic | -                  | 19.31          | -           | 17.72          | Global Epidemic            |
| A1636                                    | Global Epidemic | -                  | 19.26          | -           | 18.12          | Global Epidemic            |
| 1320                                     | Global Epidemic | -                  | 18.54          | -           | 16.67          | Global Epidemic            |
| 791                                      | Global Outlier  | -                  | 19.9           | -           | -              | Global Outlier             |

387

|          |                |       |       |       |   |                |
|----------|----------------|-------|-------|-------|---|----------------|
| 672246   | Global Outlier | -     | 17.67 | -     | - | Global Outlier |
| 672632   | Global Outlier | -     | 18.23 | -     | - | Global Outlier |
| D7795    | East African   | 17.66 | -     | 16.92 | - | East African   |
| CP225    | East African   | 18.12 | -     | 16.81 | - | East African   |
| 6396     | East African   | 17.05 | -     | 16.6  | - | East African   |
| 10136/01 | West African   | 18.59 | -     | -     | - | West African   |
| 0527/01  | West African   | 18.74 | -     | -     | - | West African   |
| 8078/01  | West African   | 20.26 | -     | -     | - | West African   |

388

389

390

391

392

393 \*Derived from Feasey *et al* 2016 clade-typing using whole genome sequences

394

395 **Table 5** Efficiency of multiplex assays based on the average Ct values and performance analysis of  
396 assays for each primer and probe set performed with three technical replicates

| DNA concentration<br>(ng/ $\mu$ L)            | African Cluster<br>target* | Global Cluster<br>target* | East African Clade<br>target* | Global Clade<br>target* |
|-----------------------------------------------|----------------------------|---------------------------|-------------------------------|-------------------------|
| 10                                            | 23.33 $\pm$ 0.34           | 21.95 $\pm$ 0.49          | 22.73 $\pm$ 0.48              | 21.36 $\pm$ 0.26        |
| 1                                             | 27.34 $\pm$ 0.08           | 25.55 $\pm$ 0.81          | 26.08 $\pm$ 0.28              | 23.99 $\pm$ 0.54        |
| 0.1                                           | 28.89 $\pm$ 0.59           | 28.96 $\pm$ 0.39          | 27.97 $\pm$ 0.42              | 27.15 $\pm$ 0.49        |
| 0.01                                          | 34.00 $\pm$ 0.54           | 32.12 $\pm$ 0.46          | 32.62 $\pm$ 0.12              | 30.05 $\pm$ 0.48        |
| 0.001                                         | 35.93 $\pm$ 0.65           | 35.15 $\pm$ 0.90          | 35.30 $\pm$ 0.09              | 34.12 $\pm$ 0.49        |
| **Determination coefficient (R <sup>2</sup> ) | 0.98 (0.95 - 1.00)         | 0.99 (0.98 - 1.01)        | 0.99 (0.98 - 1.00)            | 0.99 (0.98 - 0.99)      |
| Slope                                         | 0.30                       | 0.30                      | 0.31                          | 0.31                    |
| Slope derived efficiency                      | 1.00                       | 1.00                      | 1.04                          | 1.04                    |

397

\*Average Ct values  $\pm$  standard deviation (n = 3) for 5 target DNA concentrations

\*\* Determination coefficient (numbers in brackets indicate 95% Confidence Interval)

398

399 **Table 6** Cycle threshold (Ct) values from clade-typing real-time PCR assays performed with a DNA  
400 dilution series

| DNA concentration ( $\mu$ M)* |                  |                  |                  |                  |                       |
|-------------------------------|------------------|------------------|------------------|------------------|-----------------------|
| 10                            | 1                | 0.1              | 0.01             | 0.001            | Real-time PCR Assay   |
| 23.33 $\pm$ 0.34              | 27.34 $\pm$ 0.08 | 28.89 $\pm$ 0.59 | 34.00 $\pm$ 0.54 | 35.98 $\pm$ 0.56 | African Region        |
| 21.95 $\pm$ 0.49              | 24.78 $\pm$ 0.74 | 28.96 $\pm$ 0.39 | 32.12 $\pm$ 0.46 | 35.15 $\pm$ 0.90 | Global Region         |
| 22.73 $\pm$ 0.48              | 26.08 $\pm$ 0.28 | 27.97 $\pm$ 0.42 | 32.62 $\pm$ 0.12 | 35.30 $\pm$ 0.09 | East African Clade    |
| 21.36 $\pm$ 0.26              | 23.99 $\pm$ 0.54 | 27.15 $\pm$ 0.49 | 30.05 $\pm$ 0.48 | 34.12 $\pm$ 0.49 | Global Epidemic Clade |

401 \*Average Ct values  $\pm$  standard deviation (n =3) for 5 DNA concentrations
